# Supplementary material for: A quantum-chemical-based guide to analyze/quantify the cytotoxicity of ionic liquids
Source: Royal Society of Chemistry journal article supplement (doi:10.1039/b919806g), 2009-11-03
Supplement: b919806g.pdf [file b919806g.pdf]

# A Quantum-Chemical-Based Guide to Analyze/Quantify the Cytotoxicity of Ionic Liquids

J. S. Torrecilla,<sup>a</sup> J. Palomar,<sup>\*b</sup> J. Lemus,<sup>a</sup> F. Rodríguez.<sup>a</sup>

**Table S1.** Nomenclature.

| <b>Substituent (R)</b>                  | <b>Abbreviation</b> |
|-----------------------------------------|---------------------|
| Methyl                                  | M                   |
| Ethyl                                   | E                   |
| Propyl                                  | Pr                  |
| Butyl                                   | B                   |
| Pentyl                                  | Pn                  |
| Hexyl                                   | Hx                  |
| Heptyl                                  | Hp                  |
| Octyl                                   | O                   |
| Nonyl                                   | N                   |
| Decyl                                   | D                   |
| Dodecyl                                 | Dod                 |
| Tetradecyl                              | Ted                 |
| Hexadecyl                               | Hxd                 |
| Octadecyl                               | Ocd                 |
| Hydroxy                                 | OH                  |
| 2-Hydroxypropyl                         | OHPr                |
| 2-Hydroxyoctyl                          | OHO                 |
| 2-Ethoxyethyl                           | EOE                 |
| 2-Methoxyethyl                          | MeOE                |
| 2-Methoxypropyl                         | MeOPr               |
| Phenylethyl                             | PhE                 |
| Phenylmethyl                            | PhM                 |
| Dimethylamino                           | NMe <sub>2</sub>    |
| <b>Head Group</b>                       | <b>Abbreviation</b> |
| 1-R-3-methylimidazolium                 | Mim                 |
| 1-R-3-ethylimidazolium                  | Eim                 |
| 1-R-pyridinium                          | Pyr                 |
| 1-R-4-R'-pyridinium                     | 1R4R'Pyr            |
| 1-R-3-R'-pyridinium                     | 1R3R'Pyr            |
| 1-R-1-methylpyrrolidinium               | Pyrr                |
| 1-R-quinolinium                         | Quin                |
| Phosphonium                             | P                   |
| Ammonium                                | N                   |
| <b>Anion</b>                            | <b>Abbreviation</b> |
| Bis[1,2-benzenediolate(2-)O1,O2] borate | BBDB <sup>-</sup>   |
| Octylsulfate                            | OcSO <sub>4</sub>   |
| Ethylsulfate                            | EtSO <sub>4</sub>   |
| Methylsulfate                           | MeSO <sub>4</sub>   |
| bis(trifluoromethane sulfonimide)       | NTf <sub>2</sub>    |

**Table S2.** Calculated values of  $S_{\sigma\text{-profile}}$  parameters for cations included in QSAR studies.

| <b>Cation</b> | <b>S (-0.011 e/Å<sup>2</sup>)</b> | <b>S(-0.008 e/Å<sup>2</sup>)</b> | <b>S(-0.006 e/Å<sup>2</sup>)</b> | <b>S(-0.002 e/Å<sup>2</sup>)</b> |
|---------------|-----------------------------------|----------------------------------|----------------------------------|----------------------------------|
| Emim          | 6.81                              | 13.01                            | 16.37                            | 6.09                             |
| Prmim         | 6.70                              | 13.41                            | 15.59                            | 9.64                             |
| Bmim          | 6.77                              | 11.97                            | 14.90                            | 13.39                            |
| Pnmim         | 6.70                              | 12.06                            | 14.56                            | 17.77                            |
| Hmim          | 6.69                              | 12.45                            | 14.13                            | 22.10                            |
| Hpmim         | 6.73                              | 12.44                            | 14.10                            | 25.94                            |
| Omim          | 6.80                              | 12.38                            | 14.15                            | 29.47                            |
| Nmim          | 6.77                              | 12.37                            | 14.08                            | 33.02                            |
| Demim         | 6.67                              | 12.55                            | 14.29                            | 36.60                            |
| Tetradmim     | 6.69                              | 12.23                            | 14.40                            | 50.36                            |
| HexDmim       | 6.70                              | 12.22                            | 14.42                            | 57.23                            |
| OctDmim       | 6.70                              | 12.24                            | 14.46                            | 63.99                            |
| Heim          | 7.18                              | 15.48                            | 15.14                            | 23.17                            |
| Beim          | 6.38                              | 11.33                            | 16.63                            | 16.17                            |
| Dceim         | 6.20                              | 11.65                            | 15.80                            | 39.18                            |
| EtOemim       | 7.30                              | 12.72                            | 19.54                            | 11.74                            |
| MeOemim       | 7.47                              | 12.55                            | 20.87                            | 9.64                             |
| MeOprnim      | 7.66                              | 12.46                            | 20.45                            | 12.81                            |
| OHomim        | 7.74                              | 12.92                            | 15.02                            | 27.96                            |
| OHprnim       | 7.89                              | 13.77                            | 18.48                            | 6.19                             |
| PhEtmim       | 7.05                              | 16.74                            | 21.44                            | 10.15                            |
| PhMemim       | 7.44                              | 17.59                            | 18.37                            | 8.36                             |
| Epyr          | 10.61                             | 12.51                            | 14.16                            | 11.05                            |
| Prpyr         | 10.12                             | 11.99                            | 13.53                            | 13.94                            |
| Bpyr          | 10.03                             | 11.60                            | 12.61                            | 17.54                            |
| Pnpyr         | 10.03                             | 11.57                            | 12.15                            | 21.85                            |
| Hxpyr         | 10.05                             | 11.52                            | 12.12                            | 26.00                            |
| Hppyr         | 10.06                             | 11.51                            | 12.06                            | 30.07                            |
| Opyr          | 10.03                             | 11.50                            | 12.15                            | 33.67                            |
| 1O4MPyr       | 7.72                              | 12.23                            | 15.94                            | 37.19                            |
| 1B4MPyr       | 7.93                              | 12.21                            | 16.76                            | 21.05                            |
| 1B3MPyr       | 7.75                              | 11.92                            | 16.92                            | 20.66                            |
| NM4           | 11.62                             | 14.05                            | 12.51                            | 0.29                             |
| NE4           | 4.62                              | 17.46                            | 26.49                            | 10.72                            |
| NPr4          | 3.70                              | 13.45                            | 24.28                            | 21.17                            |
| NB4           | 3.22                              | 12.38                            | 21.51                            | 36.27                            |
| NPn4          | 3.93                              | 10.73                            | 21.46                            | 52.26                            |
| NHx4          | 3.72                              | 10.79                            | 20.66                            | 70.79                            |
| OH-EM2N       | 9.69                              | 12.44                            | 10.21                            | 1.57                             |
| BuM3N         | 9.00                              | 14.76                            | 14.85                            | 9.35                             |
| BuEM2N        | 6.84                              | 16.18                            | 18.12                            | 12.19                            |
| Et4P          | 3.75                              | 17.58                            | 22.49                            | 12.21                            |
| Pr4P          | 5.49                              | 12.64                            | 22.20                            | 22.19                            |
| But4P         | 5.08                              | 11.02                            | 19.34                            | 36.91                            |
| Pn4P          | 4.92                              | 11.09                            | 17.99                            | 54.75                            |
| Hx4P          | 4.92                              | 10.96                            | 17.65                            | 70.75                            |
| Hx3MP         | 4.14                              | 10.56                            | 18.23                            | 100.72                           |
| Bquin         | 8.35                              | 16.22                            | 15.46                            | 20.18                            |
| Hxquin        | 8.38                              | 16.15                            | 14.82                            | 28.55                            |
| Oquin         | 8.34                              | 16.10                            | 14.76                            | 36.73                            |
| Bpyrr         | 8.56                              | 7.21                             | 10.15                            | 13.80                            |
| Morpholinium  | 6.95                              | 16.42                            | 14.23                            | 10.94                            |
| Na            | 38.08                             | 0.00                             | 0.00                             | 0.00                             |

**Table S3.** Calculated values of  $S_{\sigma\text{-profile}}$  parameters for anion included in QSAR studies.

| Anion                                                         | S (-0.002 e/Å <sup>2</sup> ) | S(0.009 e/Å <sup>2</sup> ) | S(0.011 e/Å <sup>2</sup> ) | S(0.015 e/Å <sup>2</sup> ) | S(0.017 e/Å <sup>2</sup> ) | S(0.019 e/Å <sup>2</sup> ) |
|---------------------------------------------------------------|------------------------------|----------------------------|----------------------------|----------------------------|----------------------------|----------------------------|
| BBDB                                                          | 20.32                        | 1.98                       | 0.00                       | 0.00                       | 0.00                       | 0.00                       |
| BF4                                                           | 0.00                         | 5.36                       | 26.15                      | 0.00                       | 0.00                       | 0.00                       |
| Br                                                            | 0.00                         | 0.00                       | 0.00                       | 0.27                       | 29.11                      | 0.06                       |
| CF <sub>3</sub> CO <sub>2</sub>                               | 0.38                         | 2.55                       | 1.81                       | 4.14                       | 8.47                       | 3.53                       |
| CF <sub>3</sub> SO <sub>3</sub>                               | 0.35                         | 1.40                       | 6.13                       | 9.61                       | 0.30                       | 0.00                       |
| CH <sub>3</sub> CO <sub>2</sub>                               | 3.89                         | 0.99                       | 1.35                       | 1.57                       | 2.24                       | 6.16                       |
| CH <sub>3</sub> SO <sub>3</sub>                               | 3.21                         | 1.14                       | 3.50                       | 5.93                       | 14.95                      | 6.32                       |
| (C <sub>2</sub> F <sub>5</sub> ) <sub>3</sub> PF <sub>3</sub> | 31.93                        | 0.00                       | 0.00                       | 0.00                       | 0.00                       | 0.00                       |
| Cl                                                            | 0.00                         | 0.00                       | 0.00                       | 0.00                       | 0.28                       | 26.02                      |
| Co(CO) <sub>4</sub>                                           | 6.05                         | 0.00                       | 0.00                       | 0.00                       | 0.00                       | 0.00                       |
| DCN                                                           | 0.05                         | 3.33                       | 4.46                       | 8.12                       | 6.74                       | 0.97                       |
| EtSO <sub>4</sub>                                             | 6.09                         | 2.35                       | 3.63                       | 15.49                      | 6.24                       | 0.01                       |
| F                                                             | 0.00                         | 0.00                       | 0.00                       | 0.00                       | 0.00                       | 0.00                       |
| HSO <sub>4</sub>                                              | 0.36                         | 2.73                       | 2.90                       | 17.04                      | 4.91                       | 0.00                       |
| MeSO <sub>4</sub>                                             | 4.33                         | 2.55                       | 3.67                       | 15.69                      | 5.67                       | 0.01                       |
| N(CF <sub>3</sub> ) <sub>2</sub>                              | 4.21                         | 0.00                       | 0.00                       | 0.00                       | 0.00                       | 0.00                       |
| NTf <sub>2</sub>                                              | 2.57                         | 12.29                      | 17.35                      | 0.00                       | 0.00                       | 0.00                       |
| OctSO <sub>4</sub>                                            | 29.96                        | 2.36                       | 3.50                       | 15.45                      | 6.24                       | 0.01                       |
| PF <sub>6</sub>                                               | 0.00                         | 38.55                      | 6.54                       | 0.00                       | 0.00                       | 0.00                       |
| SCN                                                           | 0.00                         | 6.52                       | 7.58                       | 5.07                       | 3.79                       | 1.64                       |

**Table S4.** Ionic liquids included in the external validation sample

| Cation                   | Anion                     | $S_{\sigma\text{-profile}}$ cation |        |        |        |        | $S_{\sigma\text{-profile}}$ anion |       |       |       |       |
|--------------------------|---------------------------|------------------------------------|--------|--------|--------|--------|-----------------------------------|-------|-------|-------|-------|
|                          |                           | -0.011                             | -0.008 | -0.006 | -0.002 | -0.002 | 0.009                             | 0.011 | 0.015 | 0.017 | 0.019 |
| 1Bu4NMe <sub>2</sub> Pyr | NTf <sub>2</sub>          | 7.0                                | 15.7   | 16.9   | 25.9   | 2.6    | 12.3                              | 17.4  | 0.0   | 0.0   | 0.0   |
| 1Bu4NMe <sub>2</sub> Pyr | Cl                        | 7.0                                | 15.7   | 16.9   | 25.9   | 0.0    | 0.0                               | 0.0   | 0.0   | 0.3   | 26.0  |
| 1Hx4NMe <sub>2</sub> Pyr | NTf <sub>2</sub>          | 6.9                                | 15.7   | 16.4   | 34.6   | 2.6    | 12.3                              | 17.4  | 0.0   | 0.0   | 0.0   |
| 1Hx4NMe <sub>2</sub> Pyr | Cl                        | 6.9                                | 15.7   | 16.4   | 34.6   | 0.0    | 0.0                               | 0.0   | 0.0   | 0.3   | 26.0  |
| 1Et4NMe <sub>2</sub> Pyr | NTf <sub>2</sub>          | 7.2                                | 16.6   | 18.2   | 18.8   | 2.6    | 12.3                              | 17.4  | 0.0   | 0.0   | 0.0   |
| 1Et4NMe <sub>2</sub> Pyr | Br                        | 7.2                                | 16.6   | 18.2   | 18.8   | 0.0    | 0.0                               | 0.0   | 0.3   | 29.1  | 0.1   |
| Bmim                     | Toluene-4-SO <sub>3</sub> | 6.8                                | 12.0   | 14.9   | 13.4   | 5.8    | 2.2                               | 2.4   | 9.2   | 12.9  | 2.5   |
| Emim                     | Toluene-4-SO <sub>3</sub> | 6.8                                | 13.0   | 16.4   | 6.1    | 5.8    | 2.2                               | 2.4   | 9.2   | 12.9  | 2.5   |
| Na                       | Toluene-4-SO <sub>3</sub> | 38.1                               | 0.0    | 0.0    | 0.0    | 5.8    | 2.2                               | 2.4   | 9.2   | 12.9  | 2.5   |
| 1Hx4Mepyr                | BF <sub>4</sub>           | 8.0                                | 12.0   | 16.1   | 29.3   | 0.0    | 5.4                               | 26.2  | 0.0   | 0.0   | 0.0   |
| Octpyrr                  | BF <sub>4</sub>           | 8.3                                | 7.3    | 9.2    | 30.7   | 0.0    | 5.4                               | 26.2  | 0.0   | 0.0   | 0.0   |
| Octpyrr                  | Cl                        | 8.3                                | 7.3    | 9.2    | 30.7   | 0.0    | 0.0                               | 0.0   | 0.0   | 0.3   | 26.0  |
| Hxpyrr                   | Cl                        | 8.5                                | 7.3    | 9.3    | 22.5   | 0.0    | 0.0                               | 0.0   | 0.0   | 0.3   | 26.0  |
| 1Me3Him                  | BF <sub>4</sub>           | 6.1                                | 9.1    | 9.5    | 3.5    | 0.0    | 5.4                               | 26.2  | 0.0   | 0.0   | 0.0   |
| 1Et3Prim                 | Br                        | 6.3                                | 11.4   | 17.8   | 12.1   | 0.0    | 0.0                               | 0.0   | 0.3   | 29.1  | 0.1   |
